# Supplementary material
Source: Research Square preprint supplement (doi:10.21203/rs.3.rs-9566915/v1)
Supplement: Supplementary file 1 [file 3e65dd0dd986ab80ebfb3794.docx]

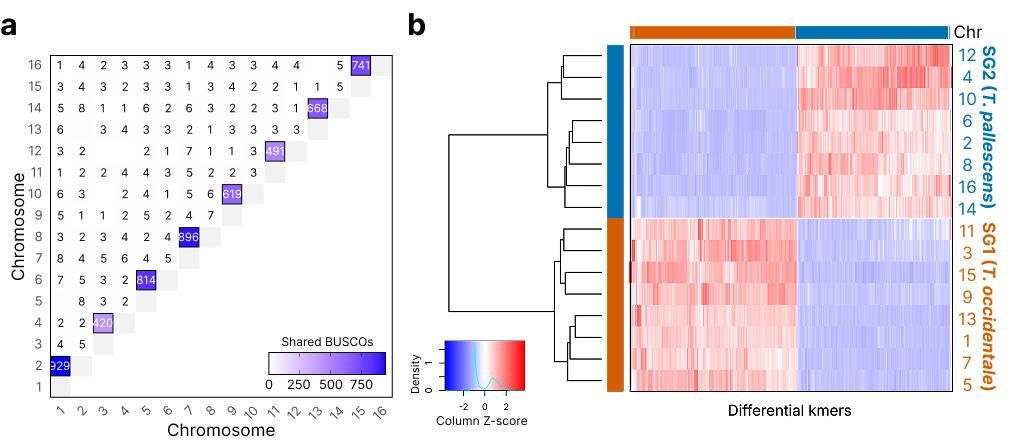


**Figure S1.** Subgenome partitioning of the allotetraploid *T. repens*.(**a**) Shared presence of BUSCO genes between chromosomes, indicating chromosomal homology. (**b**) SubPhaser hierarchical clustering of differential k-mer profiles across chromosomes, separating homologous chromosome sets into 2 subgenome groups (orange = SG1; blue = SG2).

**
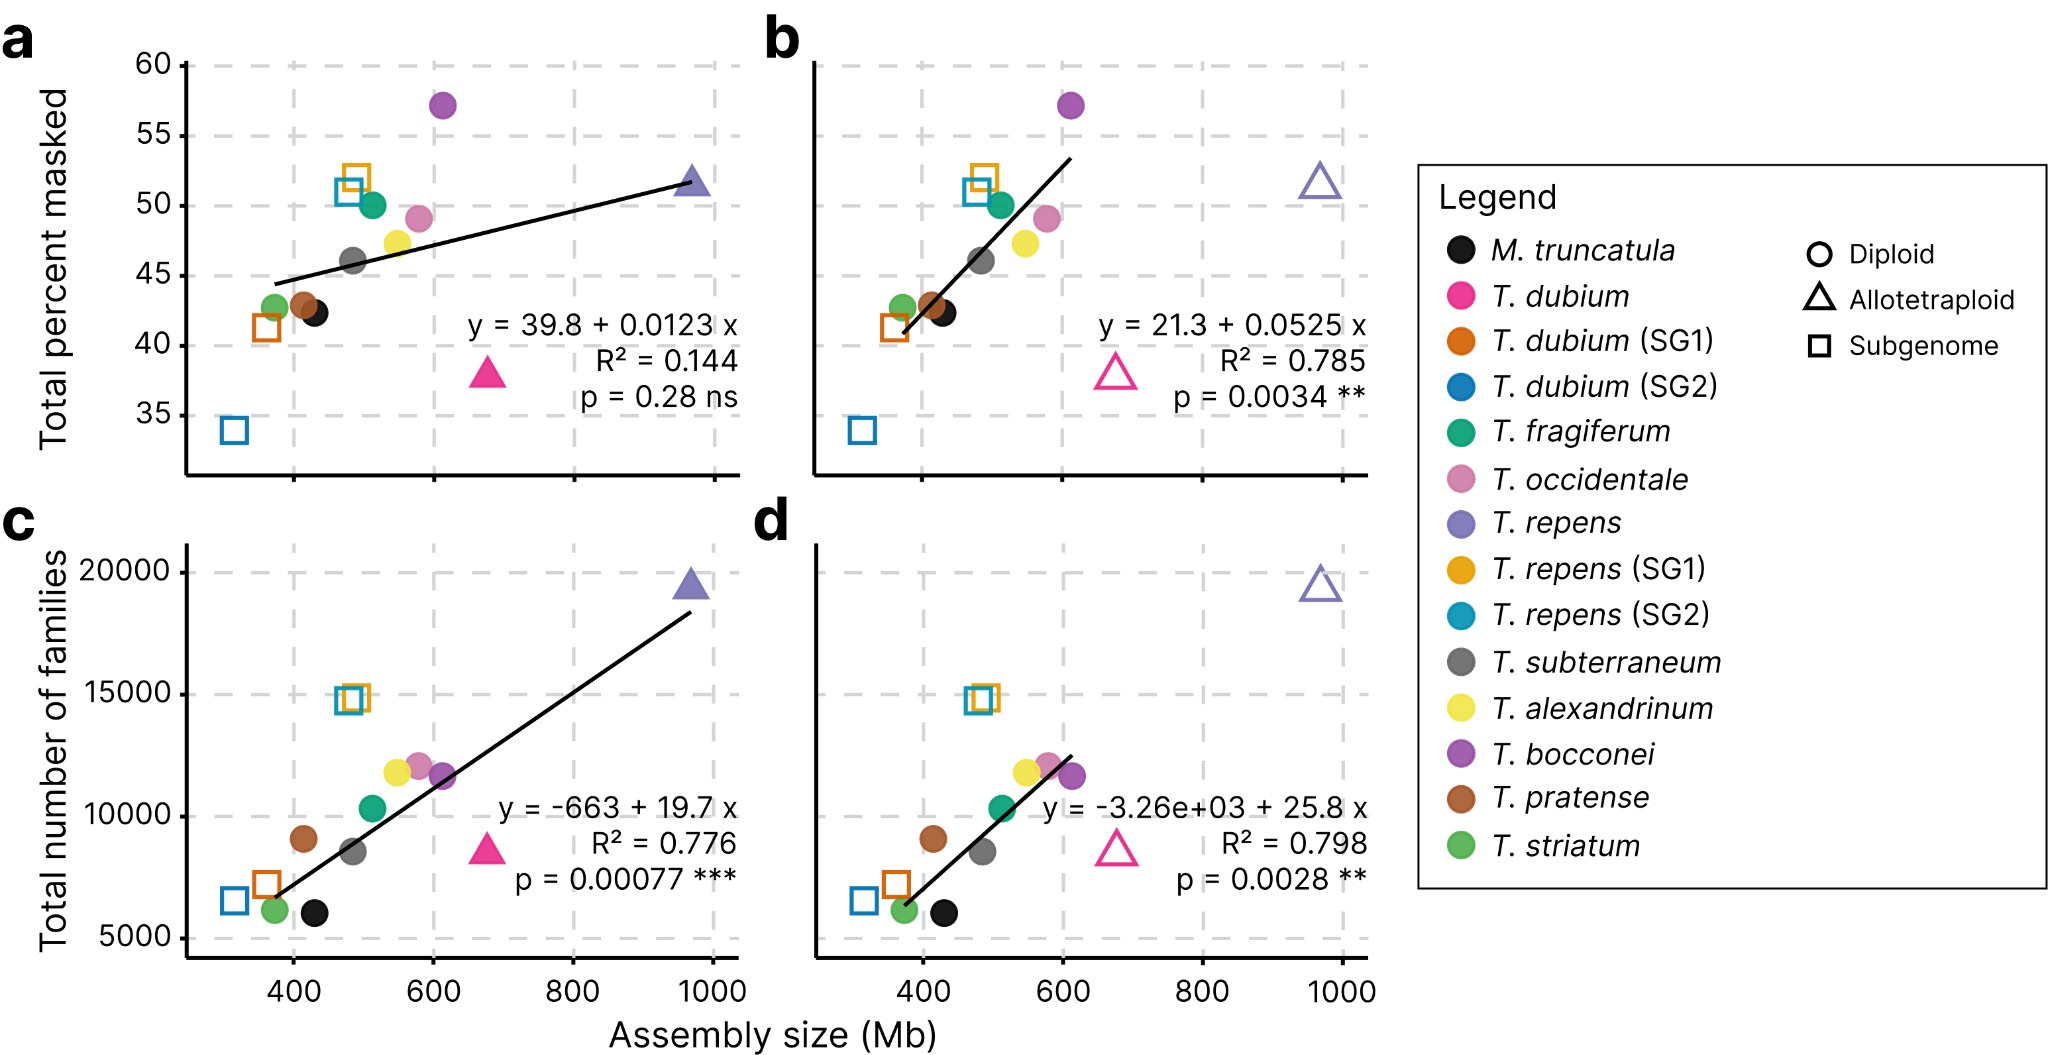
**

**Figure S2. Relationship between genome size and TE content across *Trifolium*.** (**a-b**) Total repeat fraction, as the percentage of masked bases, against assembly size, using (a) all whole-genome assemblies or (b) diploid assemblies only. (**c-d**) TE family diversity, as the number of distinct TE families, against assembly size, using (c) all whole-genome assemblies or (d) diploid assemblies only. Hollow points were included for context, including points for subgenome values, but were excluded from the corresponding linear regression.The coefficient of determination (R2)


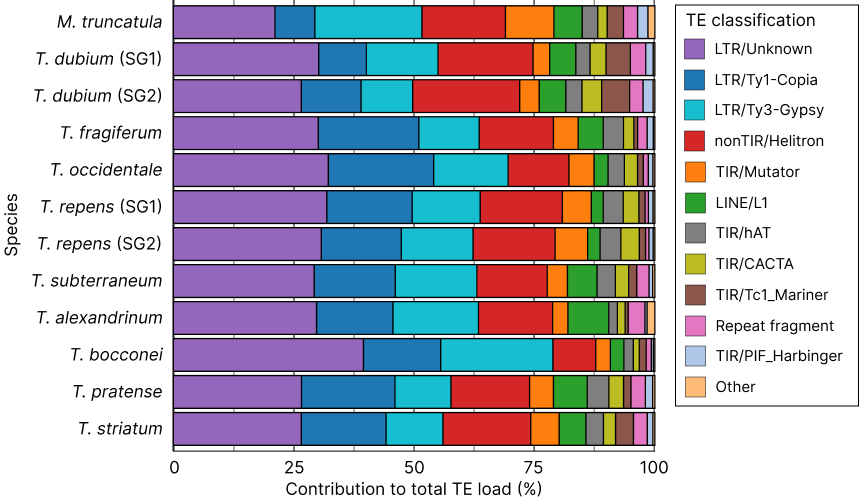


**Figure S3. Relative contribution of TE classes to total TE load across *Trifolium* species.**

Values expressed as percentages of the total TE content per genome, showing the proportional contribution of each class to the total repetitive fraction.

**
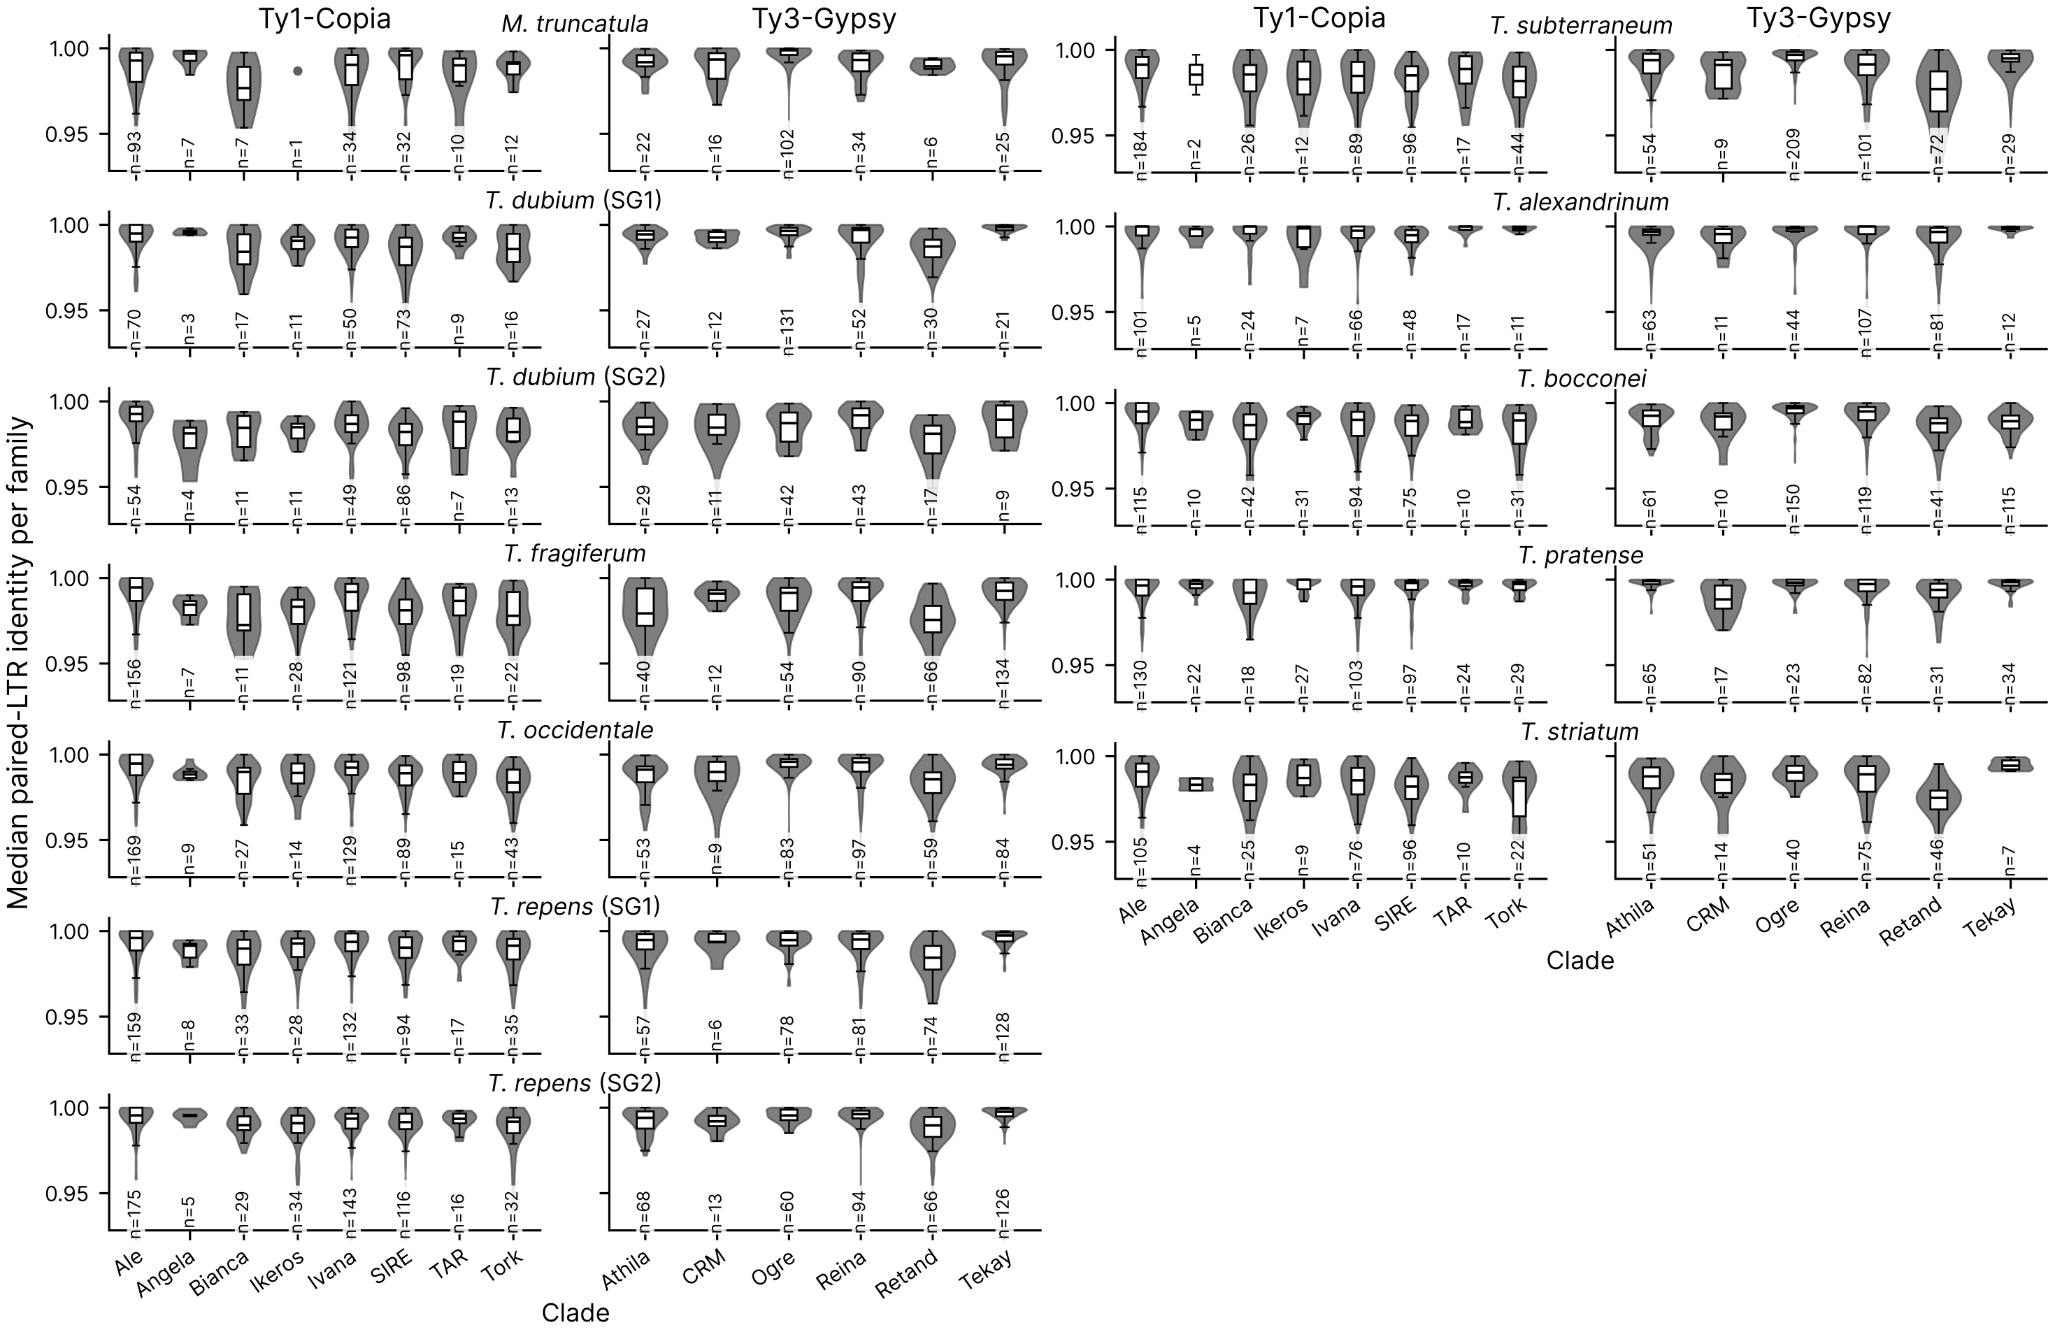
**

**Figure S4. Clade-level paired-LTR identity across *Trifolium*.** Violin plots show family-level median paired-LTR identity for Ty1-Copia and Ty3-Gypsy clades in each diploid species.
