# Supplementary material
Source: Research Square preprint supplement (doi:10.21203/rs.3.rs-9566915/v1)
Supplement: Supplementary file 1 [file 09c509d8c0b6efd897977ef1.xlsx]

## Sheet: S1-EDTASummary
Species	TE class	Count	Total masked (bp)	Total masked (%)	Distinct families (n)
M. truncatula	LINE/L1	23558	10735868	2.5	115
	LINE/RTE	3202	978288	0.23	3
	LINE/unknown	2951	1028613	0.24	1
	LTR/Copia	15059	15094207	3.51	631
	LTR/Gypsy	29002	40599090	9.45	606
	LTR/unknown	67596	38513113	8.97	928
	nonTIR/helitron	118814	31599720	7.36	463
	rDNA/45S	89	22357	0.01	233
	rDNA/snRNA	58	13279	0	248
	repeat_fragment	26833	5345787	1.24	266
	SINE/tRNA	144	50979	0.01	1
	TIR/CACTA	11954	3560576	0.83	347
	TIR/hAT	21066	5890777	1.37	677
	TIR/Mutator	64822	18329494	4.27	1296
	TIR/PIF_Harbinger	15305	3963785	0.92	194
	TIR/Tc1_Mariner	28377	6180123	1.44	346
	All	428830	181906056	42.35	6355
T. dubium (overall)	LINE/L1	31697	14043535	2.07	83
	LINE/RTE	981	217490	0.03	2
	LTR/Copia	24936	28083317	4.13	894
	LTR/Gypsy	28389	33748825	4.97	999
	LTR/unknown	120579	74186885	10.92	2162
	nonTIR/helitron	195581	53356571	7.85	1005
	rDNA/45S	68	10473	0	424
	repeat_fragment	37915	7809642	1.15	335
	TIR/CACTA	30787	9375591	1.38	688
	TIR/hAT	30491	7888358	1.16	582
	TIR/Mutator	41086	9459712	1.39	797
	TIR/PIF_Harbinger	15562	4556352	0.67	294
	TIR/Tc1_Mariner	64898	14050430	2.07	567
	All	622970	256787181	37.79	8832
T. dubium (SG1)	LINE/L1	17658	8123917	2.25	83
	LINE/RTE	531	115473	0.03	2
	LTR/Copia	12564	14793375	4.1	687
	LTR/Gypsy	16721	22242936	6.16	809
	LTR/unknown	69354	45106067	12.5	1915
	nonTIR/helitron	105373	29481284	8.17	897
	rDNA/45S	50	7723	0	392
	repeat_fragment	21255	4777586	1.32	4
	TIR/CACTA	16263	4969761	1.38	571
	TIR/hAT	16863	4388509	1.22	503
	TIR/Mutator	22126	5165306	1.43	640
	TIR/PIF_Harbinger	8191	2311216	0.64	249
	TIR/Tc1_Mariner	34548	7548174	2.09	465
	All	341497	149031327	41.29	7217
T. dubium (SG2)	LINE/L1	14034	5918554	1.88	83
	LINE/RTE	450	102017	0.03	2
	LTR/Copia	12361	13297316	4.22	662
	LTR/Gypsy	11657	11508928	3.65	632
	LTR/unknown	49749	28515840	9.05	1709
	nonTIR/helitron	89912	23825891	7.56	841
	rDNA/45S	18	2750	0	400
	repeat_fragment	16582	2999887	0.95	4
	TIR/CACTA	14280	4365512	1.39	507
	TIR/hAT	13881	3594705	1.14	484
	TIR/Mutator	19193	4334131	1.38	589
	TIR/PIF_Harbinger	7355	2230354	0.71	229
	TIR/Tc1_Mariner	29639	6239531	1.98	408
	All	279111	106935416	33.94	6550
T. fragiferum	LINE/L1	25583	13407882	2.62	85
	LINE/RTE	425	77065	0.02	2
	LTR/Copia	48908	53622692	10.47	2510
	LTR/Gypsy	26944	32202868	6.29	939
	LTR/unknown	126769	77415546	15.11	2226
	nonTIR/helitron	134088	39671992	7.74	686
	nonTIR/snRNA	97	20768	0	1
	repeat_fragment	25679	5131658	1	1
	SINE/tRNA	1	103	0	1
	TIR/CACTA	19101	5550132	1.08	658
	TIR/hAT	32049	10813548	2.11	1272
	TIR/Mutator	51730	13164222	2.57	1142
	TIR/PIF_Harbinger	12303	3258921	0.64	260
	TIR/Tc1_Mariner	9393	2023724	0.39	149
	All	513070	256361121	50.04	9932
T. occidentale	LINE/L1	22169	8267306	1.43	69
	LINE/RTE	480	123444	0.02	2
	LTR/Copia	54315	62296482	10.77	2803
	LTR/Gypsy	26608	43984877	7.61	1150
	LTR/unknown	148944	91565419	15.84	3307
	nonLTR/pararetrovirus	362	230720	0.04	1
	nonTIR/helitron	134183	35897381	6.21	599
	nonTIR/snRNA	78	8254	0	1
	repeat_fragment	16641	3007257	0.52	1
	TIR/CACTA	18985	7824878	1.35	883
	TIR/hAT	33147	9654299	1.67	1237
	TIR/Mutator	51984	14844875	2.57	1372
	TIR/PIF_Harbinger	10282	2704566	0.47	212
	TIR/Tc1_Mariner	16067	3354437	0.58	188
	All	534245	283764195	49.08	11825
T. repens (overall)	LINE/L1	23043	12612159	1.3	62
	LINE/RTE	1490	380993	0.04	3
	LTR/Bel_Pao	6	906	0	1
	LTR/Copia	84348	86207293	8.9	3637
	LTR/Gypsy	47967	72827660	7.52	1746
	LTR/unknown	265040	155920604	16.1	5350
	nonLTR/pararetrovirus	48	49048	0.01	1
	nonTIR/helitron	314374	85237363	8.8	1214
	nonTIR/snRNA	2	216	0	1
	repeat_fragment	19234	3495109	0.36	2
	TIR/CACTA	50330	17683914	1.83	1593
	TIR/hAT	68215	21178580	2.19	2393
	TIR/Mutator	104966	31856707	3.29	2189
	TIR/PIF_Harbinger	17307	4665596	0.48	475
	TIR/Tc1_Mariner	32857	6376375	0.66	421
	All	1029227	498492523	51.48	19088
T. repens (SG1)	LINE/L1	11451	6321966	1.29	62
	LINE/RTE	732	186772	0.04	3
	LTR/Bel_Pao	3	458	0	1
	LTR/Copia	44838	45293735	9.25	2467
	LTR/Gypsy	23678	36015427	7.36	1291
	LTR/unknown	135565	81376982	16.63	4470
	nonLTR/pararetrovirus	30	38877	0.01	1
	nonTIR/helitron	158991	43549914	8.9	1053
	nonTIR/snRNA	1	103	0	1
	repeat_fragment	9568	1765726	0.36	1
	TIR/CACTA	24497	8331454	1.7	1273
	TIR/hAT	34915	10619456	2.17	1690
	TIR/Mutator	52285	15343548	3.14	1617
	TIR/PIF_Harbinger	9152	2510125	0.51	358
	TIR/Tc1_Mariner	16648	3231059	0.66	313
	All	522354	254585602	52.02	14601
T. repens (SG2)	LINE/L1	11592	6290193	1.32	62
	LINE/RTE	758	194221	0.04	3
	LTR/Bel_Pao	3	448	0	1
	LTR/Copia	39557	40626944	8.49	2315
	LTR/Gypsy	24215	36458695	7.62	1246
	LTR/unknown	129489	75181457	15.72	4490
	nonLTR/pararetrovirus	18	10171	0	1
	nonTIR/helitron	155343	41663399	8.71	1061
	nonTIR/snRNA	1	113	0	2
	repeat_fragment	9661	1727109	0.36	2
	TIR/CACTA	25834	9353104	1.96	1221
	TIR/hAT	33322	10567350	2.21	1718
	TIR/Mutator	52683	16516220	3.45	1704
	TIR/PIF_Harbinger	8114	2141302	0.45	362
	TIR/Tc1_Mariner	16207	3145032	0.66	300
	All	506797	243875758	50.99	14488
T. subterraneum	LINE/L1	30206	13764311	2.84	99
	LINE/RTE	547	126421	0.03	3
	LTR/Copia	46996	37664624	7.78	1394
	LTR/Gypsy	31536	37902033	7.83	1257
	LTR/unknown	105727	65467420	13.52	1974
	nonLTR/pararetrovirus	101	91343	0.02	2
	nonTIR/helitron	129662	32683353	6.75	543
	rDNA/45S	365	166333	0.03	394
	rDNA/snRNA	80	21451	0	278
	repeat_fragment	30204	5749127	1.19	2
	SINE/tRNA	58	27248	0.01	1
	TIR/CACTA	17932	6142180	1.27	625
	TIR/hAT	32643	8497041	1.76	975
	TIR/Mutator	38887	9390961	1.94	881
	TIR/PIF_Harbinger	5766	1634698	0.34	148
	TIR/polinton	61	19106	0	1
	TIR/Tc1_Mariner	17479	3731179	0.77	323
	All	488250	223078829	46.08	8900
T. alexandrinum	LINE/L1	68046	22026783	4.02	79
	LINE/RTE	539	99884	0.02	4
	LTR/Copia	41534	41161818	7.52	1619
	LTR/Gypsy	38339	46176514	8.43	1989
	LTR/unknown	158069	77264553	14.11	3921
	nonTIR/helitron	132865	39959009	7.3	935
	rDNA/45S	49	4451	0	218
	rDNA/snRNA	293	77102	0.01	332
	repeat_fragment	34838	9023403	1.65	265
	SINE/tRNA	4840	3362449	0.61	3
	TIR/CACTA	12181	4182900	0.76	543
	TIR/hAT	17602	4645636	0.85	900
	TIR/Mutator	29778	8289113	1.51	957
	TIR/PIF_Harbinger	5002	1137900	0.21	259
	TIR/Tc1_Mariner	7387	1620004	0.3	355
	All	551362	259031519	47.3	12379
T. bocconei	LINE/L1	23025	9847556	1.61	78
	LINE/RTE	574	103499	0.02	3
	LTR/Copia	59565	56248871	9.19	2467
	LTR/Gypsy	62091	81830264	13.36	1971
	LTR/unknown	212958	138615840	22.64	3331
	nonTIR/helitron	124214	31153791	5.09	711
	repeat_fragment	17028	3727622	0.61	356
	SINE/tRNA	68	19558	0	1
	TIR/CACTA	15327	4325091	0.71	493
	TIR/hAT	25707	6873199	1.12	927
	TIR/Mutator	44653	10689479	1.75	1019
	TIR/PIF_Harbinger	6656	1482235	0.24	151
	TIR/Tc1_Mariner	23374	5064769	0.83	291
	All	615240	349981774	57.17	11799
T. pratense	LINE/L1	36336	12514812	3.02	85
	LINE/RTE	1089	230357	0.06	5
	LTR/Copia	31174	34555683	8.35	1696
	LTR/Gypsy	13477	20705851	5	797
	LTR/unknown	83164	47385485	11.45	2417
	nonTIR/helitron	111523	29068428	7.02	623
	nonTIR/snRNA	347	92172	0.02	1
	repeat_fragment	27222	5320622	1.29	1
	SINE/tRNA	7	488	0	1
	TIR/CACTA	15055	5414996	1.31	601
	TIR/hAT	29456	7992826	1.93	1185
	TIR/Mutator	39968	8806298	2.13	972
	TIR/PIF_Harbinger	11975	2708238	0.65	168
	TIR/Tc1_Mariner	13677	2735420	0.66	200
	All	414470	177531676	42.89	8752
T. striatum	LINE/L1	16385	8857213	2.38	97
	LINE/RTE	818	191332	0.05	5
	LTR/Copia	32497	28087278	7.54	1114
	LTR/Gypsy	18066	18840289	5.06	621
	LTR/unknown	73315	42446336	11.39	1127
	nonTIR/helitron	116482	29040218	7.8	529
	nonTIR/snRNA	96	19254	0.01	427
	repeat_fragment	23778	4629225	1.24	1
	SINE/tRNA	60	15411	0	1
	TIR/CACTA	14315	4026852	1.08	397
	TIR/hAT	19995	5776776	1.55	485
	TIR/Mutator	42381	9449426	2.54	883
	TIR/PIF_Harbinger	8969	1831189	0.49	256
	TIR/Tc1_Mariner	25665	5930616	1.59	292
	All	392822	159141415	42.72	6235

## Sheet: S2-ClassBpDiffSG
Species	TE class	Families (n)	Absolute subgenome divergence (Mb)	Contribution to total subgenome divergence (%)	SG1 extra (Mb)	SG2 extra (Mb)
T. dubium	LTR/Unknown	2009	39.09	37.13	27.69	11.4
	LTR/Ty1-Copia	808	15.47	14.69	8.46	7.01
	LTR/Ty3-Gypsy	836	20.51	19.48	15.3	5.21
	nonTIR/Helitron	758	13.49	12.82	9.36	4.14
	TIR/Mutator	476	2.36	2.24	1.59	0.77
	LINE/L1	83	3.03	2.88	2.62	0.41
	TIR/hAT	431	2.29	2.17	1.58	0.71
	TIR/CACTA	412	2.19	2.08	1.31	0.88
	TIR/Tc1_Mariner	328	3.09	2.94	2.1	0.99
	Repeat fragment	424	2.56	2.43	2.17	0.39
	TIR/PIF_Harbinger	197	1.18	1.12	0.62	0.56
		3	0.02	0.02	0.02	0
T. repens	LTR/Unknown	5002	55.46	41.28	31.29	24.17
	LTR/Ty1-Copia	1778	22.63	16.85	12.41	10.22
	LTR/Ty3-Gypsy	1358	26.11	19.43	12.29	13.81
	nonTIR/Helitron	932	12.7	9.46	7.33	5.37
	TIR/Mutator	1228	5.6	4.17	2.22	3.38
	LINE/L1	62	0.96	0.71	0.5	0.46
	TIR/hAT	1065	4.36	3.25	2.27	2.09
	TIR/CACTA	938	4.27	3.18	1.66	2.62
	TIR/Tc1_Mariner	204	0.67	0.5	0.33	0.34
	Repeat fragment	278	0.68	0.5	0.36	0.32
	TIR/PIF_Harbinger	270	0.86	0.64	0.6	0.26
	Other	6	0.04	0.03	0.03	0.01

## Sheet: S3-LTRIdentitySummary
Species	Subgenome	LTR superfamily	n	Median LTR identity	Mean LTR identity	Q25 LTR identity	Q75 LTR identity
M. truncatula	N/A	Ty1-Copia	198	0.992175	0.987022	0.981725	0.9972
	N/A	Ty3-Gypsy	204	0.996875	0.993523	0.991775	0.9989
T. alexandrinum	N/A	Ty1-Copia	266	0.9983	0.994504	0.99435	1
	N/A	Ty3-Gypsy	318	0.99775	0.994467	0.994925	1
T. bocconei	N/A	Ty1-Copia	408	0.9913	0.987169	0.983925	0.9953
	N/A	Ty3-Gypsy	495	0.99395	0.99123	0.98825	0.9974
T. dubium	SG1	Ty1-Copia	251	0.9912	0.987533	0.98325	0.99595
	SG1	Ty3-Gypsy	275	0.9957	0.99299	0.9908	0.99805
	SG2	Ty1-Copia	234	0.98525	0.983965	0.978513	0.991575
	SG2	Ty3-Gypsy	151	0.98775	0.985187	0.97905	0.993075
T. fragiferum	N/A	Ty1-Copia	455	0.9879	0.984946	0.97805	0.9958
	N/A	Ty3-Gypsy	397	0.9904	0.986183	0.9799	0.99595
T. occidentale	N/A	Ty1-Copia	494	0.991325	0.988574	0.985	0.9957
	N/A	Ty3-Gypsy	387	0.9936	0.990347	0.988125	0.9972
T. pratense	N/A	Ty1-Copia	446	0.997475	0.994012	0.992313	1
	N/A	Ty3-Gypsy	249	0.9978	0.995223	0.99385	0.9996
T. repens	SG1	Ty1-Copia	511	0.9935	0.990462	0.9865	0.998075
	SG1	Ty3-Gypsy	431	0.9948	0.991886	0.98935	0.9986
	SG2	Ty1-Copia	556	0.99355	0.991697	0.9883	0.996825
	SG2	Ty3-Gypsy	432	0.995575	0.993781	0.9917	0.9986
T. striatum	N/A	Ty1-Copia	346	0.9857	0.983713	0.9784	0.992575
	N/A	Ty3-Gypsy	232	0.9876	0.983834	0.977825	0.993263
T. subterraneum	N/A	Ty1-Copia	467	0.9867	0.984237	0.97815	0.994
	N/A	Ty3-Gypsy	473	0.9947	0.989886	0.9869	0.9978

## Sheet: S4-AssemblyContiguity
Species	Assembly name	Total scaffold length (Mbp)	Scaffolds (n)	Scaffold N50 (Mbp)	Scaffold L50	Scaffold AUN	Contigs (n)	Contig N50 (Mbp)	Contig L50	Contig AUN	Gaps (n)
T. repens	UTM_Trep_v1.0	968.22	18	59.9	8	60.71	105	18.34	19	20.23	87
T. dubium	drTriDubi3.1	679.5	156	46.01	7	46.99	742	3.01	75	3.28	586
T. bocconei	drTriBocc1.hap1.1	612.45	63	95.29	3	105.23	382	3.66	51	4.32	319
T. occidentale	drTriOcci1.hap1.1	578.26	71	73.08	4	71.61	426	2.97	63	3.48	355
T. alexandrinum	TalH_r1.0	547.72	463	55.87	4	62.61	514	14.59	13	16.77	51
T. fragiferum	drTriFrag1.1	512.41	21	63.35	4	65.46	222	6.2	27	7	201
T. subterraneum	drTriSubt1.1	484.24	67	58.99	4	60.57	575	1.72	84	2.1	508
T. striatum	drTriStri1.hap1.1	372.59	32	48.48	4	54.32	287	2.69	47	3.03	255
T. pratense	ARS_RC_1.1	414.03	90	57.91	4	58.06	321	3.2	42	3.74	231
M. truncatula	MtrunA17r5.0-ANR	430.01	42	56.24	4	53.64	64	23.31	7	27.88	22

## Sheet: S5-AssemblyCompleteness
Species	Assembly name	Subgenome	BUSCO completeness (miniprot)	BUSCO completeness (AUGUSTUS)	LAI score
T. repens	UTM_Trep_v1.0	SG1+SG2	C:98.3%[S:2%,D:96.3%],F:0.1%,M:1.6%	C:92.6%[S:20.2%,D:72.3%],F:0.7%,M:6.8%	NA
		SG1	C:97.7%[S:92.7%,D:5%],F:0.2%,M:2.1%	C:90.4%[S:87%,D:3.5%],F:1.3%,M:8.3%	25.49
		SG2	C:97.6%[S:92.9%,D:4.7%],F:0.2%,M:2.2%	C:90.7%[S:87.4%,D:3.3%],F:1.2%,M:8.2%	23.86
T. dubium	drTriDubi3.1	SG1+SG2	C:97.6%[S:3.2%,D:94.4%],F:0.2%,M:2.2%	C:92%[S:18.9%,D:73.1%],F:0.7%,M:7.3%	NA
		SG1	C:97%[S:93.1%,D:4%],F:0.2%,M:2.8%	C:90%[S:86.6%,D:3.4%],F:1.4%,M:8.7%	24.55
		SG2	C:95.5%[S:92.1%,D:3.4%],F:0.4%,M:4.1%	C:88.8%[S:86%,D:2.9%],F:1.4%,M:9.8%	14.61
T. bocconei	drTriBocc1.hap1.1	NA	C:97.6%[S:92.6%,D:4.9%],F:0.2%,M:2.2%	C:89.9%[S:86.3%,D:3.6%],F:1.3%,M:8.8%	25.81
T. occidentale	drTriOcci1.hap1.1	NA	C:98%[S:92.9%,D:5.1%],F:0.1%,M:1.9%	C:90.7%[S:87%,D:3.7%],F:1.3%,M:8%	29.53
T. alexandrinum	TalH_r1.0	NA	C:97.5%[S:91.8%,D:5.8%],F:0.3%,M:2.2%	C:90.1%[S:85.6%,D:4.5%],F:1.3%,M:8.6%	29.44
T. fragiferum	drTriFrag1.1	NA	C:97.7%[S:92.7%,D:5.1%],F:0.1%,M:2.1%	C:90.2%[S:86.5%,D:3.7%],F:1.4%,M:8.3%	24.05
T. subterraneum	drTriSubt1.1	NA	C:97.2%[S:91.8%,D:5.4%],F:0.3%,M:2.6%	C:90.2%[S:86.2%,D:4.1%],F:1.3%,M:8.5%	22.65
T. striatum	drTriStri1.hap1.1	NA	C:97.8%[S:92.7%,D:5.1%],F:0.2%,M:2%	C:91.1%[S:87.1%,D:3.9%],F:1.2%,M:7.7%	24.21
T. pratense	ARS_RC_1.1	NA	C:97.7%[S:84.4%,D:13.3%],F:0.2%,M:2.1%	C:90.3%[S:86.1%,D:4.2%],F:1.3%,M:8.4%	39.06
M. truncatula	MtrunA17r5.0-ANR	NA	C:98.3%[S:92.8%,D:5.4%],F:0.2%,M:1.6%	C:91.3%[S:86.9%,D:4.4%],F:1.3%,M:7.4%	25.05

## Sheet: S6-Versions
Software	Version	Source	Reference / tag
ncbi-datasets	16.10.3	Biocontainer	quay.io/staphb/ncbi-datasets:16.10.3
gfastats	1.3.11	Biocontainer	quay.io/biocontainers/gfastats:1.3.11--h077b44d_0
BUSCO	6.0.0	Biocontainer	quay.io/biocontainers/busco:6.0.0--pyhdfd78af_0
LTR_retriever	3.0.2	Conda	bioconda::ltr_retriever=3.0.2=hdfd78af_0
SubPhaser	1.2.6	GitHub	github.com/zhangrengang/SubPhaser/tree/5889b47
bwa-mem2	2.2.1	Biocontainer	quay.io/biocontainers/bwa-mem2:2.2.1--he70b90d_8
samtools	1.22.1	Biocontainer	quay.io/biocontainers/samtools:1.22.1--h96c455f_0
bedtools	2.31.1	Biocontainer	quay.io/biocontainers/bedtools:2.31.1--h13024bc_3
BUSCO_phylogenomics	20240919	Biocontainer	quay.io/biocontainers/busco_phylogenomics:20240919--pyhdfd78af_0
IQ-TREE3	3.0.1	Biocontainer	quay.io/biocontainers/iqtree:3.0.1--h503566f_0
ASTRAL	5.7.8	Biocontainer	quay.io/biocontainers/astral-tree:5.7.8--hdfd78af_1
iTOL	v7	Website	https://itol.embl.de/
EDTA	2.2.2	Conda	bioconda::edta=2.2.2=hdfd78af_1
EDTA-Audit-Tool	v1.0.0	GitHub	https://github.com/DiLiu-Lab/EDTA-Audit-Tool/tree/a46b15e
TEsorter	1.4.7	Conda	bioconda::tesorter=1.4.7=pyhdfd78af_1
TRASH_2	a045d0	GitHub	github.com/vlothec/TRASH_2/tree/a045d0
