# Supplementary material
Source: Research Square preprint supplement (doi:10.21203/rs.3.rs-9566915/v1)
Supplement: Supplementary file 2 [file 7ba266529c36b767d897d0bb.docx]

**Supplemental Figure Legends**

**Figure S1.** Subgenome partitioning of the allotetraploid *T. repens*.(**a**) Shared presence of BUSCO genes between chromosomes, indicating chromosomal homology. (**b**) SubPhaser hierarchical clustering of differential k-mer profiles across chromosomes, separating homologous chromosome sets into 2 subgenome groups (orange = SG1; blue = SG2).

**Figure S2. Relationship between genome size and TE content across *Trifolium*.** (**a-b**) Total repeat fraction, as the percentage of masked bases, against assembly size, using (a) all whole-genome assemblies or (b) diploid assemblies only. (**c-d**) TE family diversity, as the number of distinct TE families, against assembly size, using (c) all whole-genome assemblies or (d) diploid assemblies only. Hollow points were included for context, including points for subgenome values, but were excluded from the corresponding linear regression.The coefficient of determination (R2) and associated p-value indicate the strength and significance of the correlation, respectively.

**Figure S3. Relative contribution of TE classes to total TE load across *Trifolium* species.**

Values expressed as percentages of the total TE content per genome, showing the proportional contribution of each class to the total repetitive fraction.

**Figure S4. Clade-level paired-LTR identity across *Trifolium*.** Violin plots show family-level median paired-LTR identity for Ty1-Copia and Ty3-Gypsy clades in each diploid species.

**Supplemental Table Legends**

**Supplemental Table 1.** **Overall TE annotation summary breakdown per class with number of elements, bp and % masked and number of distinct families.** Number of annotated TEs, total masked sequence in base pairs, percentage of the assembly masked, and number of distinct TE families are shown for each TE class in each assembly. “All” gives the summed total across all classes.

**Supplemental Table 2. TE-class composition of subgenome divergence in TE family size in *T. dubium* and *T. repens*.** Subgenome differences in TE family size were calculated for families present in each both subgenomes, with absolute divergence calculated as the summed |SG1 - SG2| difference in bp masked. SG1 and SG2-extra contributions indicate the direction of excess masked sequence within each TE class.

**Supplemental Table 3. Paired-LTR identity summary statistics for structurally intact LTR-RTs.** For each species or subgenome, paired percentage identity between the 5’ and 3’ LTRs of structurally intact Ty1-Copia and Ty3-Gypsy elements is summarised by the number of elements, median, mean and interquartile range.

**Supplemental Table 4. Assembly contiguity statistics.** Assembly size, scaffold-level contiguity, contig-level contiguity, and gap counts are shown for each genome assembly, as computed by gfastats.

**Supplemental Table 5. BUSCO completeness and repeat continuity per assembly and subgenome.** BUSCO was run in genome mode, with the fabales_odb12 lineage, using both miniprot and AUGUSTUS for gene prediction. LTR Assembly Index (LAI) scores were obtained with LTR_retriever. For allotetraploid species, values are shown separately for each subgenome (SG1 and SG2), based on chromosomal scaffold assignments from SubPhaser. Combined SG1+SG2 BUSCO results correspond to that for the entire assembly.

**Supplemental Table 6. Software and versions used in this study.** Software was run using either Biocontainer images with Singularity, or as conda-installed packages, depending on availability and compatibility. Where no containerised or conda distributions were available, software was installed directly from the source repository.
