# Supplementary material
Source: Research Square preprint supplement (doi:10.21203/rs.3.rs-9566915/v1)
Supplement: Supplementary file 3 [file 9a47a0c777921df0d7b6a0fe.docx]

**Table 1. Genome-wide and subgenome-level SI ratios.** Solo LTR and structurally intact LTR-RT counts are shown for each genome and, where applicable, for each subgenome.

| **Genome** | **Total solo** | **Total intact** | **Overall SI ratio** |
| --- | --- | --- | --- |
| *M. trunculata* | 12581 | 2690 | 4.67695 |
| *T. alexandrinum* | 27260 | 8388 | 3.24988 |
| *T. bocconei* | 65321 | 10227 | 6.38711 |
| *T. dubium* | 14052 | 5017 | 2.80088 |
| *T. dubium* (SG1) | 7773 | 2929 | 2.65381 |
| *T. dubium* (SG2) | 6236 | 2088 | 2.98659 |
| *T. fragiferum* | 24427 | 6487 | 3.76553 |
| *T. occidentale* | 32043 | 15030 | 2.13194 |
| *T. pratense* | 14123 | 4534 | 3.11491 |
| *T. repens* | 48425 | 11120 | 4.35477 |
| *T. repens* (SG1) | 24679 | 5546 | 4.44987 |
| *T. repens* (SG2) | 23745 | 5574 | 4.25996 |
| *T. striatum* | 15547 | 2661 | 5.84254 |
| *T. subterranum* | 24168 | 6942 | 3.48142 |

**Table 2. Genome assemblies used in this study.** Allotetraploid species are delimited by “*”. Assemblies lacking a published reference or genome note are denoted by “**” and listed by their WGS project ID.

| **Species name** | **Assembly name** | **Assembly accession** | **Chromosome Number** | **Assembly size (Mb)** | **Reference** |
| --- | --- | --- | --- | --- | --- |
| *T. repens* * | UTM_Trep_v1.0 | GCA_030408175.1 | 16 | 967.7 | [[33]](https://www.zotero.org/google-docs/?IczWRU) |
| *T. dubium* * | drTriDubi3.1 | GCA_951804385.1 | 15 | 679.1 | [[51]](https://www.zotero.org/google-docs/?dv2tFt) |
| *T. bocconei* | drTriBocc1.hap1.1 | GCA_965615655.1 | 6 | 612 | CBFEAR01 ** |
| *T. occidentale* | drTriOcci1.hap1.1 | GCA_964059555.1 | 8 | 577.8 | CAXKXK01 ** |
| *T. alexandrinum* | TalH_r1.0 | GCA_043005315.1 | 8 | 547.7 | [[35]](https://www.zotero.org/google-docs/?I8nn7N) |
| *T. fragiferum* | drTriFrag1.1 | GCA_954870985.1 | 8 | 512 | [[52]](https://www.zotero.org/google-docs/?mOf6bB) |
| *T. subterraneum* | drTriSubt1.1 | GCA_951799995.1 | 8 | 483.8 | [[53]](https://www.zotero.org/google-docs/?7JkNrS) |
| *T. striatum* | drTriStri1.hap1.1 | GCA_964059935.1 | 7 | 372.2 | CAXKXW01 ** |
| *T. pratense* | ARS_RC_1.1 | GCF_020283565.1 | 7 | 413.6 | [[54]](https://www.zotero.org/google-docs/?syoFz7) |
| *M. truncatula* | MtrunA17r5.0-ANR | GCF_003473485.1 | 8 | 429.6 | [[55]](https://www.zotero.org/google-docs/?qEhOnZ) |
